# Supplementary material for: A TonB-dependent receptor regulates antifungal HSAF biosynthesis in Lysobacter
Source: PubMed Central journal article supplement (PMC4886534; doi:10.1038/srep26881), 2016-05-31
Supplement: srep26881-s1.pdf [file srep26881-s1.pdf]

1 **Supplementary Materials**

2 **A TonB-dependent receptor regulates antifungal HSAF biosynthesis in *Lysobacter***

3 Ruping Wang<sup>a</sup>, Huiyong Xu<sup>a</sup>, Liangcheng Du<sup>c</sup>, Shan-Ho Chou<sup>d</sup>, Hongxia Liu<sup>a</sup>, Youzhou Liu<sup>b</sup>,  
4 Fengquan Liu<sup>\*b</sup> and Guoliang Qian<sup>\*a</sup>

5 <sup>a</sup> College of Plant Protection, Nanjing Agricultural University, Nanjing 210095, China/Key Laboratory of Integrated  
6 Management of Crop Diseases and Pests (Nanjing Agricultural University), Ministry of Education

7 <sup>b</sup> Institute of Plant Protection, Jiangsu Academy of Agricultural Science, Nanjing 210014, P.R. China

8 <sup>c</sup> Department of Chemistry, University of Nebraska-Lincoln, Lincoln, Nebraska 68588, United States

9 <sup>d</sup> Institute of Biochemistry, and NCHU Agricultural Biotechnology Center, National Chung Hsing University,  
10 Taichung, Taiwan, ROC

11 <sup>\*</sup>To whom correspondence should be addressed. Tel: +86-25-84396109. Fax: +86-25-84396109. E-mail:

12 [glqian@njau.edu.cn](mailto:glqian@njau.edu.cn) or [fqliu20011@sina.com](mailto:fqliu20011@sina.com)

13

14

## Outlines

15 **Figure S1.** 2-D gel proteome analysis of the *lesR* overexpression strain.

16 **Figure S2.** The genomic organization of each *lesR*-controlled TBDR coding genes in *L.*  
17 *enzymogenes*.

18 **Figure S3.** Quantification of the HSAF yield from the *tonB* mutant of *L. enzymogenes*.

19 **Figure S4.** Overexpression of *lesR* caused an approximately twice increase on the transcription of  
20 *TBDR7* in comparison to the control strain.

21 **Table S1.** Primers used in this study

22 **Table S2.** Mutant confirmation by PCR in this study

23

24

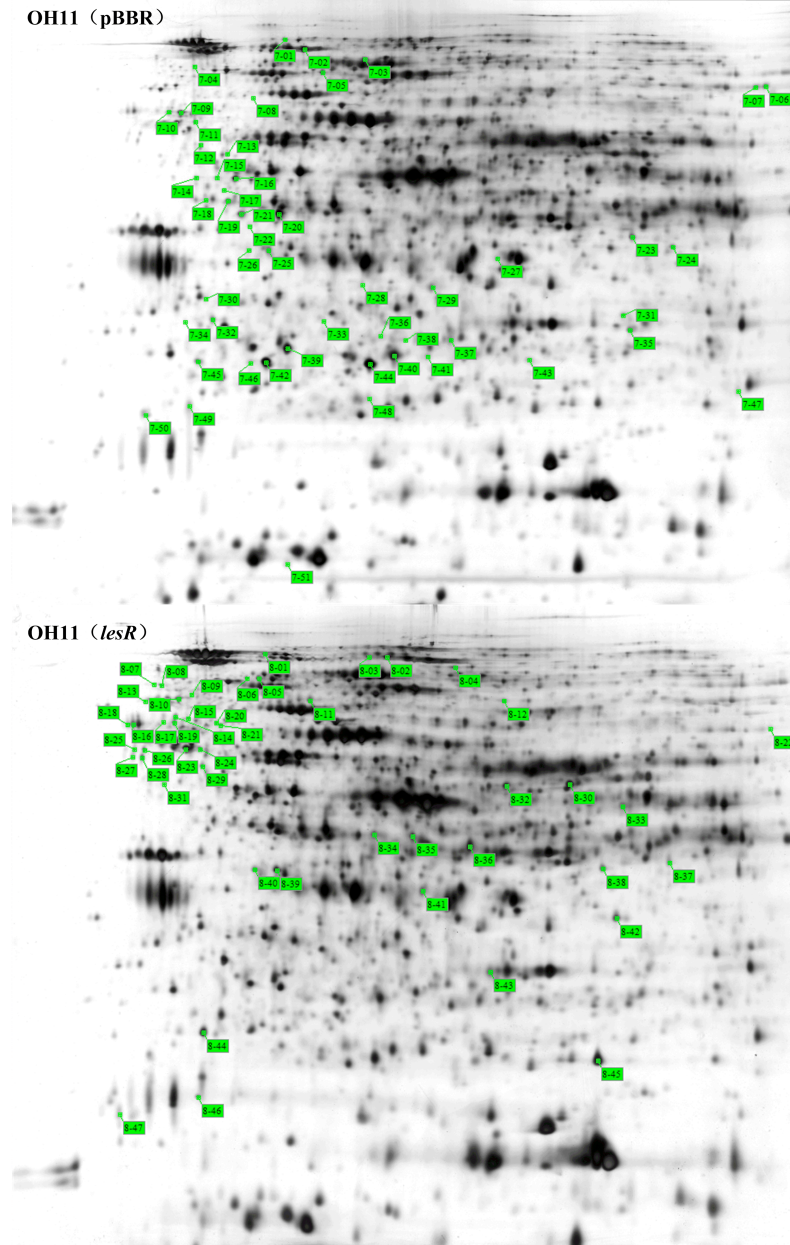

25

26

27

28 **Figure S1. 2-D gel proteome analysis of the *lesR* overexpression strain.** The up-expressed

29 protein spots with the threshold ratio of 1.5 were numbered in green either in OH11 (pBBR) or

30 OH11 (*lesR*) compared to each other. Detailed information of the identified *lesR*-controlled31 proteins was provided **Table 2**. OH11(pBBR), the control strain, representing the wild-type OH1132 of *L. enzymogenes* containing an empty expressing vector; OH11(*lesR*), the *lesR* overexpression

33 strain.

34

35

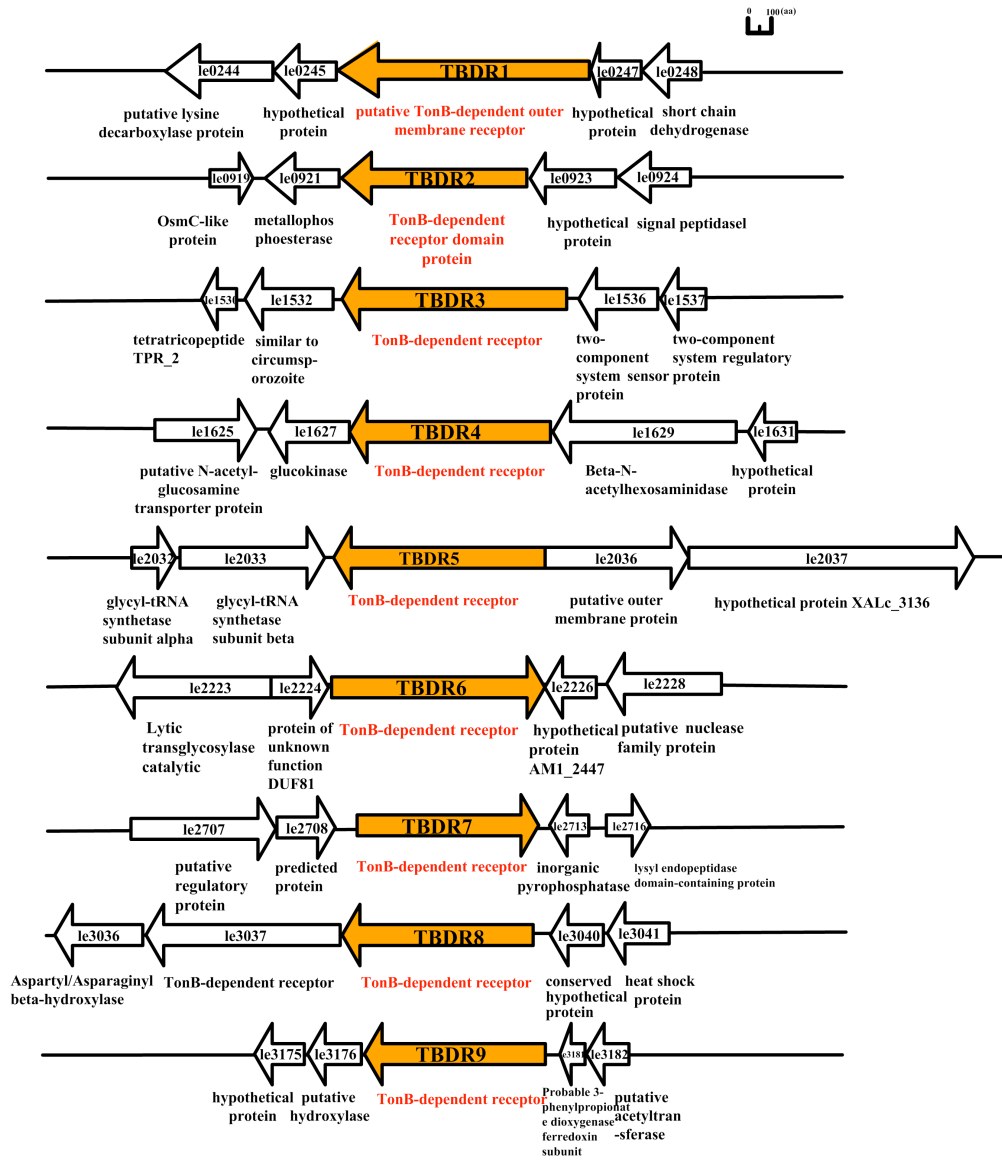

36

37 **Figure S2. The genomic organization of each *lesR*-controlled TBDR coding genes in *L.***

38 ***enzymogenes*.** Each TBDR was colored, whereas other genes were shown in white arrows. The

39 predicted gene products were provided below each arrow. The scale indicates the amino-acid size

40 was identical to 100 aa.

41

42

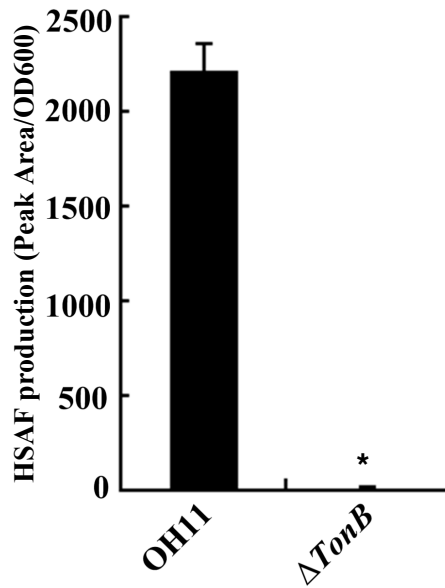

43

44

45 **Figure S3. Quantification of the HSAF yield from the *tonB* mutant of *L. enzymogenes*.**

46 Mutation of *tonB* (GU121672) almost completely abolished the HSAF production. Three

47 replicates for each treatment were used, and the experiment was repeated three times. Vertical bars

48 represent standard errors. The asterisk above the bars indicate a significant difference between the

49 wild-type strain OH11 and the tested strain (\* $p < 0.05$ ).

50

51

52

53

54

55

56

57

58

59

60

61

62

63

64

65

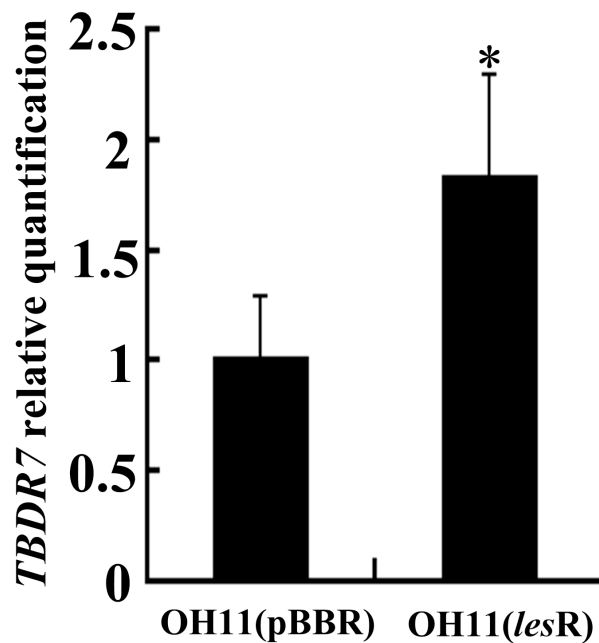

66

67 **Figure S4. Overexpression of *lesR* caused an approximately twice increase on the**  
68 **transcription of *TBDR7* in comparison to the control strain.** The control strain is OH11  
69 (pBBR), representing the wide-type OH11 containing an empty vector; OH11 (*lesR*), the *lesR*  
70 overexpressing strain. Each column indicates the mean of three biologically independent  
71 quantitative RT-PCR experiments. Vertical bars represent standard errors. The asterisk above the  
72 bars indicate a significant difference between the wild-type strain OH11 and the tested strains (\**p*  
73 < 0.05).

#### 74 **Supplementary reference**

- 75 1. Qian, G. L. *et al.* *Lysobacter enzymogenes* uses two distinct cell-cell signaling systems for  
76 differential regulation of secondary-metabolite biosynthesis and colony morphology. *Appl.*  
77 *Environ. Microbiol.* **79**, 6604-6616 (2013a).
- 78 2. Schöffler, H. & Braun, V. Transport across the outer membrane of *Escherichia coli* K12 via the  
79 FhuA receptor is regulated by the TonB protein of the cytoplasmic membrane. *Mol. Gen.*  
80 *Genet.* **217**, 378-383 (1989).

81

82

83

84

85  
86  
87  
88  
89

**Table S1 Primers used in this study**

| Primer          | Sequence <sup>a</sup>                           | Purpose                                                       | Source     |
|-----------------|-------------------------------------------------|---------------------------------------------------------------|------------|
| <i>TBDR1-1F</i> | 5'-GGGGTACCCGACTCCGCCACGCATTCCA-3'              | To amplify a 314-bp upstream homologue arm of <i>TBDR1</i>    | This study |
| <i>TBDR1-1R</i> | 5'-CCCAAGCTTTCGCCTTCCTTGGTGATGTTGA-3'           |                                                               |            |
| <i>TBDR1-2F</i> | 5'-CCCAAGCTTCCGGCTGGAACACTACAACACTACCT-3'       | To amplify a 1054-bp downstream homologue arm of <i>TBDR1</i> | This study |
| <i>TBDR1-2R</i> | 5'-GCTCTAGA CGGCGGAAATCACGAAAA-3'               |                                                               |            |
| <i>TBDR2-1F</i> | 5'-CCC <del>CGT</del> ACCCGAGGGCGGTGCGGAGTTC-3' | To amplify a 788-bp upstream homologue arm of <i>TBDR2</i>    | This study |
| <i>TBDR2-1R</i> | 5'-CCCTCTAGACAGCAGCAGGCTGGCGAC-3'               |                                                               |            |
| <i>TBDR2-2F</i> | 5'-CCCTCTAGACGCAACATCACCAACGAGAA GA-3'          | To amplify a 999-bp downstream homologue arm of <i>TBDR2</i>  | This study |
| <i>TBDR2-2R</i> | 5'-CGGAATTCAGCGAGTACAGCAGCCACAGC-3'             |                                                               |            |
| <i>TBDR4-1F</i> | 5'-CGGAATTCGGTGCCAGTGGAAGGTGTTGA G-3'           | To amplify a 1062-bp upstream homologue arm of <i>TBDR4</i>   | This study |
| <i>TBDR4-1R</i> | 5'-CCCAAGCTTAGCGTGGCCTGGAACATCG-3'              |                                                               |            |
| <i>TBDR4-2F</i> | 5'-CCCAAGCTTCGTTGGTGTGGCGAACTTGC-3'             | To amplify a 985-bp downstream homologue arm of <i>TBDR4</i>  | This study |
| <i>TBDR4-2R</i> | 5'-GCTCTAGAGCGGACATGCTGCGTTTGGT-3'              |                                                               |            |
| <i>TBDR7-1F</i> | 5'-GGGGTACCCGGCTACTCGCACATCCACG-3'              | To amplify a 503-bp upstream homologue arm of <i>TBDR7</i>    | This study |
| <i>TBDR7-1R</i> | 5'-GCTCTAGACGCCAACACCTTCCACGACG-3'              |                                                               |            |
| <i>TBDR7-2F</i> | 5'-GCTCTAGACGGTGGCGGTGATGTTCTGG-3'              | To amplify a 554-bp downstream homologue arm of <i>TBDR7</i>  | This study |
| <i>TBDR7-2R</i> | 5'-CGGGATCCAACGCACGAACCCGCATCCG-3'              |                                                               |            |
| <i>TBDR8-1F</i> | 5'-GGGGTACCAACGGCGACAAGGACGAAGG-3'              | To amplify a 806-bp upstream homologue arm of <i>TBDR8</i>    | This study |
| <i>TBDR8-1R</i> | 5'-CCCAAGCTTCGTTGCCGCCGTTGTTGTAG-3'             |                                                               |            |
| <i>TBDR8-2F</i> | 5'-CCCAAGCTTGGCAACTGGTCGGAGGGCTT-3'             | To amplify a 681-bp downstream homologue arm of <i>TBDR8</i>  | This study |
| <i>TBDR8-2R</i> | 5'-GCTCTAGAGACCGAGCCCAGTTCACAGT-3'              |                                                               |            |
| <i>TBDR9-1F</i> | 5'-GGGGTACCAGTTCGTCGTGTCGCCGCTC-3'              | To amplify a 739-bp upstream homologue arm of <i>TBDR9</i>    | This study |
| <i>TBDR9-1R</i> | 5'CCCAAGCTTGGGGTGTGTCGTCGCTCTG-3'               |                                                               |            |
| <i>TBDR9-2F</i> | 5'-CCCAAGCTTGCAAGAACTACAAGGTCGCC-3'             | To amplify a 1052-bp downstream homologue arm of <i>TBDR9</i> | This study |
| <i>TBDR9-2R</i> | 5'-GCTCTAGATTGCCACCGTCGTATTCTGT-3'              |                                                               |            |
| <i>tonB-1F</i>  | 5'-ACGAATTC AACACCAGCGAGCAGTTGTT-3'             | To amplify a 706-bp downstream homologue arm of <i>tonB</i>   | This study |
| <i>tonB-1R</i>  | 5'-CCAAGCTTGTGCTGTTCGGCTTCAATTC-3'              |                                                               |            |
| <i>tonB-2F</i>  | 5'-AAAAGCTTGTGCTGCCGCACAGCGTGTCGA-3'            | To amplify a 738-bp downstream homologue arm of               | This study |

|                      |                                                     |                                                                                                                                   |            |
|----------------------|-----------------------------------------------------|-----------------------------------------------------------------------------------------------------------------------------------|------------|
| <i>tonB-2R</i>       | 5'-AA <u>TCTAGA</u> ATGCCGCCCTGGCGATCCG-3'          | <i>tonB</i>                                                                                                                       |            |
| <i>tonB-F</i>        | 5'-GATTTCGTCCCGCCGAAGCTG-3'                         | Mutant confirmation: to amplify a 991- and 250-bp DNA band from the wild-type OH11 and <i>tonB</i> -deletion mutant, respectively | This study |
| <i>tonB-R</i>        | 5'-TGATCAGCAGCACCAGCATC-3'                          |                                                                                                                                   |            |
| <i>TBDR7-F</i>       | 5'-GCT <u>CTAGAG</u> GGTGTCTGGCACTGGTCCCGGC GAT-3'  | To amplify 3266-bp fragment of <i>TBDR7</i> with its predicted promoter                                                           | This study |
| <i>TBDR7-R</i>       | 5'-GGGGTACCTCAGAAGCGCTGGGTGTACTT C-3'               |                                                                                                                                   |            |
| <i>TBDR7-Fm</i>      | 5'-TCTCGATCGCATCGAG <sup>a</sup> CGACCGGTTTCGC G-3' | To amplify pBBR- <i>TBDR7</i> (site directed mutagenesis), the box indicated the target point mutation (V74 was changed into A74) | This study |
| <i>TBDR7-Rm</i>      | 5'-GC <sup>a</sup> TCGATGCGATCGAGAGTGGTGGGGGT C-3'  |                                                                                                                                   |            |
| 16S rDNA-1           | 5'-ACGGTCGCAAGACTGAAACT-3'                          | The internal control for RT-PCR and quantitative RT-PCR                                                                           | 1          |
| 16S rDNA-2           | 5'-AAGGCACCAATCCATCTCTG-3'                          |                                                                                                                                   |            |
| q <i>pks/nrps</i> -F | 5'-CATCACATCATCTCCGATGC-3'                          | To determine the transcriptional level of the gene <i>pks/nrps</i>                                                                | 1          |
| q <i>pks/nrps</i> -R | 5'-CAGTTCCACCTTCTCCTTGC-3'                          |                                                                                                                                   |            |
| q <i>TBDR7</i> -F    | 5'-ACAACCAGAACAAGGGCAAC-3'                          | To determine the transcriptional level of the gene <i>TBDR7</i>                                                                   | This study |
| q <i>TBDR7</i> -R    | 5'-GCTGAGGTTGAGGCTGTAGA-3'                          |                                                                                                                                   |            |

<sup>a</sup> Restricted digestion enzyme site was underlined.

90  
91



Table S2 Mutant confirmation by PCR in this study

| Mutant            | Selected primers <sup>a</sup> | Expected size from wild type | Expected size from mutant | PCR validation <sup>b</sup> |
|-------------------|-------------------------------|------------------------------|---------------------------|-----------------------------|
| $\Delta TBDR1$    | <i>TBDR1</i> -1F/2R           | 3629 bp                      | 1368 bp                   |                             |
| $\Delta TBDR2$    | <i>TBDR2</i> -1F/2R           | 3944 bp                      | 1787 bp                   |                             |
| $\Delta TBDR4$    | <i>TBDR4</i> -1F/2R           | 4267 bp                      | 2047 bp                   |                             |
| $\Delta TBDR7$    | <i>TBDR7</i> -1F/2R           | 2604 bp                      | 1057 bp                   |                             |
| $\Delta TBDR8$    | <i>TBDR8</i> -1F/2R           | 3016 bp                      | 1487bp                    |                             |
| $\Delta TBDR9$    | <i>TBDR9</i> -1F/2R           | 2789 bp                      | 1791 bp                   |                             |
| $\Delta TBDR1\&7$ | <i>TBDR1</i> -1F/2R           | 3629 bp                      | 1368 bp                   |                             |
| <i>tonB</i>       | <i>tonB</i> -F/R              | 991bp                        | 250bp                     |                             |

93 <sup>a</sup> Primers sequence used here were provided in Supplementary Table S1.

94 <sup>b</sup> Red arrow and green box indicated the expected size from the wild-type OH11 or deletion mutant amplified by  
 95 selected primers, respectively; + and – means the positive control (the genomic DNA of strain OH11) and negative  
 96 control (ddH<sub>2</sub>O), respectively.
